# Supplementary material for: Theoretical calculations of the kinetics of the OH reaction with 2-methyl-2-propen-1-ol and its alkene analogue
Source: Royal Society of Chemistry journal article supplement (doi:10.1039/c4ra00695j), 2014-01-01
Supplement: c4ra00695j1.pdf [file c4ra00695j1.pdf]

## Kinetics of the OH reaction with 2-Methyl-2-Propen-1-ol and the Analogue Alkene

Thaís da Silva Barbosa <sup>a</sup>, Jorge D. Nieto <sup>c</sup>, Pablo M. Cometto <sup>c</sup>, Silvia I. Lane <sup>\*c</sup>, Glauco Favilla Bauerfeldt <sup>\*b</sup> and Graciela Arbilla <sup>a</sup>

a. Departamento de Físico-Química. Instituto de Química, Universidade Federal do Rio de Janeiro. Rio de Janeiro, RJ, Brazil. Fax: +55 21 25627265; Tel: +55 21 25627755; E-mail: [gracielaiq@gmail.com](mailto:gracielaiq@gmail.com)

b. Departamento de Química. Instituto de Ciências Exatas. Universidade Federal Rural do Rio de Janeiro. Seropédica, RJ, Brazil. Fax: +55 21 2682 2807; Tel: +55 21 2682 2807. [bauerfeldt@ufrj.br](mailto:bauerfeldt@ufrj.br)

c. Instituto de Investigaciones en Físicoquímica de Córdoba (INFIQC), CONICET, Centro Láser de Ciencias Moleculares, Departamento de Físicoquímica, Facultad de Ciencias Químicas, Universidad Nacional de Córdoba, Ciudad Universitaria, (5000) Córdoba, Argentina. [s-lane@fcq.unc.edu.ar](mailto:s-lane@fcq.unc.edu.ar)

### Supplementary Material

#### Contents

|                                                                                                                                                                                                                                      |    |
|--------------------------------------------------------------------------------------------------------------------------------------------------------------------------------------------------------------------------------------|----|
| A: Cartesian coordinates (angstroms), vibrational frequencies (cm <sup>-1</sup> ) and electronic energies (hartrees) for the stationary points on the MPO221 + OH Potential Energy Surface calculated at BHandHLYP/cc-pVDZ.....      | 2  |
| B: Cartesian coordinates (angstroms), vibrational frequencies (cm <sup>-1</sup> ) and electronic energies (hartrees) for the stationary points on the MPO221 + OH Potential Energy Surface calculated at BHandHLYP/aug- cc-pVDZ..... | 10 |
| C: Cartesian coordinates (angstroms), vibrational frequencies (cm <sup>-1</sup> ) and electronic energies (hartrees) for the stationary points on the M2 + OH Potential Energy Surface calculated at BHandHLYP/cc-pVDZ.....          | 18 |
| D: Cartesian coordinates (angstroms), vibrational frequencies (cm <sup>-1</sup> ) and electronic energies (hartrees) for the stationary points on the M2 + OH Potential Energy Surface calculated at BHandHLYP/aug- cc-pVDZ.....     | 25 |
| E: Figure: Reaction Profile showing the contribution of both $\pi$ -PC (denoted as $1\pi$ -PC in this Figure) and $2\pi$ -PC paths.....                                                                                              | 33 |
| F: Electronic energies (hartree) calculated for the stationary points along the MPO221 + OH reaction path at different theoretical levels with the cc-pVDZ basis set.....                                                            | 35 |

A: Cartesian coordinates (angstroms), vibrational frequencies (cm-1) and electronic energies (hartrees) for the stationary points on the MPO221 + OH Potential Energy Surface calculated at BHandHLYP/cc-pVDZ

MPO221 BHandHLYP/cc-pVDZ

Cartesian Coordinates

|   |           |           |           |
|---|-----------|-----------|-----------|
| C | 0.405521  | 1.453824  | -0.044616 |
| H | -0.556298 | 1.945408  | -0.130942 |
| H | 1.290309  | 2.079575  | 0.004963  |
| C | 0.494514  | 0.129517  | -0.022740 |
| C | 1.796681  | -0.606424 | 0.058735  |
| H | 2.645642  | 0.079354  | 0.062073  |
| H | 1.846968  | -1.221080 | 0.965030  |
| H | 1.913812  | -1.289430 | -0.790918 |
| C | -0.728340 | -0.745876 | -0.091120 |
| H | -0.644245 | -1.531229 | 0.677175  |
| H | -0.741138 | -1.267412 | -1.054801 |
| O | -1.948318 | -0.068297 | 0.001485  |
| H | -1.978770 | 0.364946  | 0.853995  |

Frequencies

|         |         |         |         |         |         |
|---------|---------|---------|---------|---------|---------|
| 129.82  | 179.90  | 290.68  | 355.31  | 398.60  | 451.09  |
| 559.16  | 741.83  | 875.71  | 974.53  | 995.72  | 1010.53 |
| 1045.49 | 1105.54 | 1169.87 | 1258.23 | 1318.29 | 1430.53 |
| 1446.58 | 1471.48 | 1474.69 | 1505.46 | 1514.40 | 1528.30 |
| 1805.67 | 3058.55 | 3107.89 | 3144.45 | 3163.47 | 3216.30 |
| 3241.73 | 3338.62 | 3949.62 |         |         |         |

E (BHandHLYP) .....-232.304825

$\sigma$ -PC<sub>pri</sub> BHandHLYP/cc-pVDZ

Cartesian Coordinates

|   |           |           |           |
|---|-----------|-----------|-----------|
| C | -0.364713 | 0.832071  | 1.116212  |
| H | 0.649476  | 0.788098  | 1.493015  |
| H | -1.004955 | 1.632824  | 1.471848  |
| C | -0.818853 | -0.095393 | 0.274560  |
| C | -2.229286 | -0.124020 | -0.229910 |
| H | -2.822244 | 0.695099  | 0.180712  |
| H | -2.262274 | -0.061618 | -1.324004 |
| H | -2.717228 | -1.067374 | 0.041571  |
| C | 0.063019  | -1.213399 | -0.219149 |
| H | -0.061575 | -1.293900 | -1.312466 |
| H | -0.311028 | -2.158462 | 0.192750  |
| O | 1.402498  | -1.114063 | 0.142043  |
| H | 1.741921  | -0.306044 | -0.253990 |
| O | 1.510972  | 1.564312  | -0.805509 |
| H | 0.685333  | 1.762173  | -1.271525 |

Frequencies

|         |         |         |         |         |         |
|---------|---------|---------|---------|---------|---------|
| 53.63   | 95.71   | 116.39  | 144.38  | 181.16  | 288.00  |
| 324.46  | 377.64  | 400.04  | 445.19  | 539.64  | 569.89  |
| 752.76  | 874.50  | 973.81  | 992.14  | 1008.74 | 1045.20 |
| 1107.27 | 1186.00 | 1277.91 | 1318.60 | 1444.56 | 1459.63 |
| 1471.58 | 1474.19 | 1505.36 | 1511.76 | 1524.98 | 1788.60 |
| 3062.38 | 3111.58 | 3137.77 | 3169.13 | 3218.20 | 3236.20 |
| 3336.05 | 3717.45 | 3868.50 |         |         |         |

E (BHandHLYP) .....-308.0200863

$\sigma$ -PC<sub>ter</sub> BHandHLYP/cc-pVDZ

Cartesian Coordinates

|   |           |           |           |
|---|-----------|-----------|-----------|
| C | -0.540445 | 0.429555  | 1.359686  |
| H | 0.409528  | 0.714785  | 1.795666  |
| H | -1.449792 | 0.821209  | 1.804301  |
| C | -0.582368 | -0.414084 | 0.325448  |
| C | -1.858155 | -0.876977 | -0.302374 |
| H | -2.733331 | -0.513735 | 0.239348  |
| H | -1.918682 | -0.525748 | -1.337796 |
| H | -1.902390 | -1.971697 | -0.332100 |
| C | 0.679985  | -0.985337 | -0.268090 |
| H | 0.551694  | -1.050943 | -1.358618 |
| H | 0.802322  | -2.013915 | 0.091746  |
| O | 1.838781  | -0.290255 | 0.073981  |
| H | 1.714932  | 0.599179  | -0.269190 |
| O | 0.182565  | 1.769442  | -0.928948 |
| H | -0.157096 | 2.455111  | -0.336605 |

Frequencies

|         |         |         |         |         |         |
|---------|---------|---------|---------|---------|---------|
| 61.58   | 131.74  | 159.34  | 183.39  | 190.51  | 244.55  |
| 296.45  | 393.38  | 418.25  | 461.12  | 553.61  | 628.16  |
| 746.48  | 874.97  | 970.09  | 993.81  | 1002.95 | 1050.50 |
| 1102.61 | 1177.11 | 1274.48 | 1322.34 | 1439.26 | 1453.88 |
| 1468.05 | 1492.19 | 1506.65 | 1513.21 | 1524.33 | 1765.56 |
| 3077.97 | 3113.95 | 3139.21 | 3176.32 | 3216.55 | 3236.54 |
| 3341.23 | 3853.18 | 3877.66 |         |         |         |

E (BHandHLYP) .....-308.0204422

$\pi$ -PC BHandHLYP/cc-pVDZ

Cartesian Coordinates

|   |           |           |           |
|---|-----------|-----------|-----------|
| C | -0.597750 | -2.335504 | 1.549995  |
| H | -1.309545 | -3.027122 | 1.111298  |
| H | 0.291899  | -2.744539 | 2.015888  |
| C | -0.826625 | -1.024483 | 1.571813  |
| C | -2.063708 | -0.398634 | 1.004424  |
| H | -1.816710 | 0.319974  | 0.214735  |
| H | -2.741934 | -1.146729 | 0.590710  |
| H | -2.602355 | 0.160216  | 1.778356  |
| C | 0.143801  | -0.060930 | 2.209678  |
| H | 0.291785  | 0.790098  | 1.525490  |
| H | -0.331066 | 0.356560  | 3.105599  |
| O | 1.355918  | -0.617658 | 2.610933  |
| H | 1.864025  | -0.804442 | 1.816685  |
| O | 2.009162  | -1.369767 | -0.116828 |
| H | 1.094250  | -1.697942 | -0.030592 |

Frequencies

|         |         |         |         |         |         |
|---------|---------|---------|---------|---------|---------|
| 63.12   | 115.05  | 142.01  | 174.02  | 197.57  | 289.20  |
| 299.10  | 395.02  | 429.82  | 452.01  | 557.64  | 617.84  |
| 755.50  | 874.37  | 973.74  | 990.43  | 1011.18 | 1044.56 |
| 1107.38 | 1182.54 | 1279.49 | 1317.11 | 1443.03 | 1458.48 |
| 1468.77 | 1482.12 | 1505.40 | 1510.84 | 1522.21 | 1788.67 |
| 3058.40 | 3111.22 | 3136.82 | 3168.63 | 3217.71 | 3235.30 |
| 3334.76 | 3716.82 | 3874.19 |         |         |         |

E (BHandHLYP) .....-308.0215015

TS<sub>pri</sub> BHandHLYP/cc-pVDZ

Cartesian Coordinates

|   |           |           |           |
|---|-----------|-----------|-----------|
| C | -0.194462 | 0.849889  | 1.025133  |
| H | 0.711958  | 0.662201  | 1.581190  |
| H | -0.774651 | 1.724592  | 1.296398  |
| C | -0.719432 | -0.112611 | 0.227318  |
| C | -2.077508 | -0.017406 | -0.387843 |
| H | -2.621323 | 0.864214  | -0.043603 |
| H | -2.018639 | 0.012565  | -1.482537 |
| H | -2.673371 | -0.902978 | -0.136648 |
| C | 0.116243  | -1.306017 | -0.149577 |
| H | -0.051361 | -1.515221 | -1.219951 |
| H | -0.245714 | -2.191700 | 0.388170  |
| O | 1.467718  | -1.158359 | 0.144987  |
| H | 1.719806  | -0.289199 | -0.192185 |
| O | 1.156440  | 1.587279  | -0.432133 |
| H | 0.521274  | 1.754226  | -1.139150 |

Frequencies

|         |         |         |         |         |         |
|---------|---------|---------|---------|---------|---------|
| 295.12i | 125.53  | 151.28  | 163.23  | 193.29  | 308.77  |
| 315.70  | 393.11  | 435.00  | 555.64  | 711.92  | 723.22  |
| 832.96  | 869.70  | 983.33  | 1000.93 | 1012.87 | 1040.65 |
| 1094.18 | 1180.47 | 1270.99 | 1320.94 | 1436.06 | 1441.70 |
| 1463.28 | 1501.60 | 1510.68 | 1516.45 | 1528.11 | 1672.18 |
| 3038.69 | 3104.31 | 3121.85 | 3158.80 | 3214.49 | 3258.34 |
| 3370.16 | 3791.20 | 3873.24 |         |         |         |

E (BHandHLYP) .....-308.0178656

TS<sub>ter</sub> BHandHLYP/cc-pVDZ

Cartesian Coordinates

|   |           |           |           |
|---|-----------|-----------|-----------|
| C | 0.117085  | -0.873830 | 1.099986  |
| H | -0.844291 | -0.626673 | 1.533057  |
| H | 0.589615  | -1.809905 | 1.378193  |
| C | 0.692989  | -0.037866 | 0.195383  |
| C | 2.076086  | -0.259471 | -0.328902 |
| H | 2.442129  | -1.260400 | -0.092917 |
| H | 2.097306  | -0.123700 | -1.411791 |
| H | 2.765642  | 0.468281  | 0.114927  |
| C | 0.090149  | 1.321388  | -0.067876 |
| H | 0.410102  | 1.656019  | -1.063726 |
| H | 0.499198  | 2.033145  | 0.658434  |
| O | -1.295856 | 1.337500  | 0.066519  |
| H | -1.600037 | 0.650419  | -0.534828 |
| O | -0.471044 | -0.845019 | -1.389618 |
| H | -0.635065 | -1.757374 | -1.121662 |

Frequencies

|         |         |         |         |         |         |
|---------|---------|---------|---------|---------|---------|
| 284.63i | 168.10  | 176.67  | 212.28  | 224.37  | 266.94  |
| 308.14  | 394.24  | 398.59  | 542.54  | 641.87  | 692.82  |
| 734.15  | 859.12  | 915.62  | 974.12  | 1012.12 | 1047.18 |
| 1082.71 | 1176.18 | 1266.04 | 1324.60 | 1434.23 | 1440.67 |
| 1464.02 | 1494.29 | 1504.41 | 1515.91 | 1529.83 | 1643.18 |
| 3094.86 | 3119.53 | 3148.23 | 3195.15 | 3227.73 | 3238.93 |
| 3351.61 | 3864.46 | 3872.97 |         |         |         |

E (BHandHLYP) .....-308.0183809

IM<sub>pri</sub> BHandHLYP/cc-pVDZ

Cartesian Coordinates

|   |           |           |           |
|---|-----------|-----------|-----------|
| C | 0.178608  | 1.105963  | 0.532893  |
| H | 0.568624  | 0.726031  | 1.483841  |
| H | -0.534072 | 1.906920  | 0.763442  |
| C | -0.474192 | 0.025479  | -0.256270 |
| C | -1.949909 | -0.035220 | -0.433013 |
| H | -2.395555 | 0.961347  | -0.507730 |
| H | -2.221400 | -0.596666 | -1.334020 |
| H | -2.443871 | -0.544710 | 0.410130  |
| C | 0.337502  | -1.178678 | -0.622451 |
| H | 0.239268  | -1.363856 | -1.708508 |
| H | -0.090812 | -2.070885 | -0.139988 |
| O | 1.678039  | -1.115632 | -0.229629 |
| H | 1.985164  | -0.218727 | -0.386743 |
| O | 1.327051  | 1.632642  | -0.131312 |
| H | 1.035520  | 1.999293  | -0.966574 |

Frequencies

|         |         |         |         |         |         |
|---------|---------|---------|---------|---------|---------|
| 85.67   | 106.30  | 138.77  | 216.59  | 257.67  | 337.71  |
| 388.48  | 455.14  | 557.49  | 623.05  | 807.89  | 934.01  |
| 971.43  | 996.88  | 1048.80 | 1071.04 | 1163.69 | 1201.77 |
| 1257.42 | 1287.60 | 1358.77 | 1384.20 | 1426.07 | 1447.60 |
| 1466.06 | 1499.27 | 1504.76 | 1512.93 | 1524.68 | 1530.04 |
| 3001.71 | 3054.72 | 3067.77 | 3106.00 | 3136.46 | 3151.25 |
| 3185.92 | 3872.55 | 3937.17 |         |         |         |

E (BHandHLYP) .....-308.0588574



IM<sub>ter</sub> BHandHLYP/cc-pVDZ

Cartesian Coordinates

|   |           |           |           |
|---|-----------|-----------|-----------|
| C | -0.359763 | 0.560051  | 1.354042  |
| H | 0.575923  | 0.739092  | 1.869806  |
| H | -1.295223 | 0.645563  | 1.896300  |
| C | -0.337771 | 0.277270  | -0.109806 |
| C | -1.648760 | -0.310634 | -0.600310 |
| H | -2.480788 | 0.361607  | -0.368499 |
| H | -1.619775 | -0.452589 | -1.683137 |
| H | -1.852087 | -1.273485 | -0.122129 |
| C | 0.843069  | -0.622190 | -0.472095 |
| H | 0.788744  | -0.840753 | -1.548573 |
| H | 0.776602  | -1.567748 | 0.071121  |
| O | 2.059849  | -0.024015 | -0.133761 |
| H | 2.019942  | 0.861853  | -0.500328 |
| O | -0.047446 | 1.485374  | -0.835331 |
| H | -0.572142 | 2.193440  | -0.463560 |

Frequencies

|         |         |         |         |         |         |
|---------|---------|---------|---------|---------|---------|
| 131.02  | 166.58  | 236.65  | 253.58  | 301.50  | 350.24  |
| 367.15  | 397.71  | 459.28  | 508.94  | 563.73  | 597.45  |
| 813.58  | 924.75  | 941.83  | 983.16  | 1036.48 | 1149.26 |
| 1174.50 | 1204.41 | 1262.31 | 1290.40 | 1404.12 | 1423.00 |
| 1447.69 | 1475.77 | 1492.05 | 1517.65 | 1520.10 | 1533.27 |
| 3081.45 | 3120.46 | 3186.65 | 3194.59 | 3213.28 | 3232.94 |
| 3356.99 | 3915.50 | 3953.35 |         |         |         |

E (BHandHLYP) .....-308.0582132

B: Cartesian coordinates (angstroms), vibrational frequencies (cm-1) and electronic energies (hartrees) for the stationary points on the MPO221 + OH Potential Energy Surface calculated at BHandHLYP/aug-cc-pVDZ

MPO221 BHandHLYP/aug-cc-pVDZ

Cartesian Coordinates

|   |           |           |           |
|---|-----------|-----------|-----------|
| C | -0.095712 | 1.028694  | 0.778944  |
| H | 0.964151  | 1.065943  | 0.990333  |
| H | -0.681630 | 1.906624  | 1.018692  |
| C | -0.664749 | -0.056670 | 0.266886  |
| C | -2.135901 | -0.156599 | -0.003630 |
| H | -2.656972 | 0.750313  | 0.299015  |
| H | -2.328707 | -0.326838 | -1.066610 |
| H | -2.574708 | -1.000230 | 0.536977  |
| C | 0.116245  | -1.293730 | -0.081514 |
| H | -0.154339 | -1.607210 | -1.098091 |
| H | -0.185142 | -2.107783 | 0.582263  |
| O | 1.509608  | -1.183737 | 0.050775  |
| H | 1.824459  | -0.502643 | -0.537324 |

Frequencies

|         |         |         |         |         |         |
|---------|---------|---------|---------|---------|---------|
| 99.22   | 194.56  | 253.34  | 270.24  | 414.16  | 442.46  |
| 580.93  | 743.68  | 851.93  | 984.84  | 1002.73 | 1010.55 |
| 1080.56 | 1111.88 | 1121.21 | 1265.95 | 1291.50 | 1363.66 |
| 1445.78 | 1475.23 | 1499.64 | 1504.42 | 1528.10 | 1545.33 |
| 1794.35 | 3073.68 | 3111.82 | 3140.65 | 3178.36 | 3213.48 |
| 3232.24 | 3320.73 | 4008.05 |         |         |         |

E (BHandHLYP) .....-232.3247623

$\sigma$ -PC<sub>pri</sub> BHandHLYP/ aug-cc-pVDZ

Cartesian Coordinates

|   |           |           |           |
|---|-----------|-----------|-----------|
| C | -0.302402 | 0.818239  | 1.115085  |
| H | 0.686400  | 0.738776  | 1.540203  |
| H | -0.922576 | 1.644463  | 1.437610  |
| C | -0.773074 | -0.107358 | 0.272487  |
| C | -2.168834 | -0.079219 | -0.269828 |
| H | -2.735065 | 0.763873  | 0.122987  |
| H | -2.166613 | -0.020774 | -1.362049 |
| H | -2.699903 | -0.999219 | -0.009148 |
| C | 0.067803  | -1.264274 | -0.193379 |
| H | -0.056750 | -1.366780 | -1.279730 |
| H | -0.319406 | -2.186664 | 0.248375  |
| O | 1.419464  | -1.187010 | 0.151333  |
| H | 1.767403  | -0.380804 | -0.230608 |
| O | 1.213874  | 1.602393  | -0.761234 |
| H | 0.450745  | 1.864660  | -1.285944 |

Frequencies

|         |         |         |         |         |         |
|---------|---------|---------|---------|---------|---------|
| 60.85   | 100.16  | 142.45  | 145.88  | 183.64  | 202.90  |
| 290.80  | 400.29  | 439.53  | 462.11  | 542.79  | 589.41  |
| 752.30  | 871.21  | 983.73  | 995.30  | 1004.08 | 1044.88 |
| 1100.71 | 1168.47 | 1266.81 | 1318.96 | 1435.83 | 1449.08 |
| 1478.13 | 1481.35 | 1507.78 | 1520.16 | 1530.47 | 1746.60 |
| 3067.83 | 3104.98 | 3139.87 | 3157.08 | 3209.93 | 3250.32 |
| 3354.18 | 3904.36 | 3916.22 |         |         |         |

E (BHandHLYP) .....-308.0496335

$\sigma$ -PC<sub>ter</sub> BHandHLYP/ aug-cc-pVDZ

Cartesian Coordinates

|   |           |           |           |
|---|-----------|-----------|-----------|
| C | -0.528714 | 0.452886  | 1.340551  |
| H | 0.411958  | 0.742677  | 1.786454  |
| H | -1.439823 | 0.845835  | 1.773552  |
| C | -0.570335 | -0.403565 | 0.313503  |
| C | -1.849980 | -0.877373 | -0.298322 |
| H | -2.717840 | -0.488227 | 0.231598  |
| H | -1.908147 | -0.564582 | -1.343291 |
| H | -1.899334 | -1.969809 | -0.286851 |
| C | 0.677070  | -0.995048 | -0.284104 |
| H | 0.564161  | -1.011078 | -1.374030 |
| H | 0.763768  | -2.035589 | 0.039750  |
| O | 1.863447  | -0.354282 | 0.089096  |
| H | 1.799375  | 0.550039  | -0.217304 |
| O | 0.122538  | 1.774663  | -0.876238 |
| H | -0.250597 | 2.480044  | -0.337909 |

Frequencies

|         |         |         |         |         |         |
|---------|---------|---------|---------|---------|---------|
| 66.83   | 137.10  | 139.90  | 158.91  | 181.87  | 229.08  |
| 288.72  | 400.12  | 420.25  | 495.50  | 532.20  | 580.82  |
| 735.63  | 873.10  | 974.53  | 993.61  | 998.02  | 1050.07 |
| 1098.01 | 1163.88 | 1266.96 | 1322.37 | 1438.23 | 1447.54 |
| 1474.86 | 1479.57 | 1509.75 | 1519.98 | 1530.31 | 1744.68 |
| 3094.38 | 3112.09 | 3147.68 | 3170.79 | 3213.01 | 3240.71 |
| 3342.60 | 3901.95 | 3926.96 |         |         |         |

E (BHandHLYP) .....-308.050449

$\pi$ -PC BHandHLYP/ aug-cc-pVDZ

Cartesian Coordinates

|   |           |           |           |
|---|-----------|-----------|-----------|
| C | -0.595657 | -2.336681 | 1.544545  |
| H | -1.308863 | -3.017813 | 1.098358  |
| H | 0.287447  | -2.760343 | 2.004242  |
| C | -0.824093 | -1.025707 | 1.578258  |
| C | -2.062268 | -0.399284 | 1.011720  |
| H | -1.814927 | 0.317567  | 0.223911  |
| H | -2.735324 | -1.148619 | 0.598495  |
| H | -2.600264 | 0.156198  | 1.784908  |
| C | 0.133347  | -0.052567 | 2.216656  |
| H | 0.301654  | 0.781754  | 1.523764  |
| H | -0.348237 | 0.377299  | 3.098922  |
| O | 1.347376  | -0.599226 | 2.648128  |
| H | 1.888375  | -0.786839 | 1.881840  |
| O | 2.005895  | -1.410507 | -0.195804 |
| H | 1.086689  | -1.696134 | -0.059758 |

Frequencies

|         |         |         |         |         |         |
|---------|---------|---------|---------|---------|---------|
| 53.19   | 99.42   | 130.39  | 139.81  | 181.42  | 252.47  |
| 288.90  | 395.63  | 400.00  | 448.68  | 534.76  | 559.77  |
| 747.79  | 874.35  | 978.64  | 991.01  | 1007.51 | 1046.75 |
| 1104.65 | 1165.04 | 1270.77 | 1315.94 | 1444.73 | 1452.03 |
| 1466.59 | 1476.12 | 1509.33 | 1518.86 | 1528.17 | 1779.45 |
| 3076.52 | 3108.43 | 3144.72 | 3162.37 | 3212.60 | 3237.01 |
| 3331.89 | 3742.75 | 3926.00 |         |         |         |

E (BHandHLYP) .....-308.0496316

TS<sub>pri</sub> BHandHLYP/ aug-cc-pVDZ

Cartesian Coordinates

|   |           |           |           |
|---|-----------|-----------|-----------|
| C | -0.110248 | 0.894087  | 0.985885  |
| H | 0.834558  | 0.749021  | 1.483625  |
| H | -0.675179 | 1.780499  | 1.240348  |
| C | -0.667701 | -0.090801 | 0.247218  |
| C | -2.055086 | -0.008719 | -0.303202 |
| H | -2.566809 | 0.894251  | 0.026031  |
| H | -2.047401 | -0.029564 | -1.396811 |
| H | -2.644149 | -0.872425 | 0.018754  |
| C | 0.114425  | -1.320245 | -0.119245 |
| H | -0.069171 | -1.540515 | -1.179686 |
| H | -0.267515 | -2.177320 | 0.443215  |
| O | 1.482766  | -1.230502 | 0.146288  |
| H | 1.796629  | -0.419112 | -0.258445 |
| O | 1.180198  | 1.569062  | -0.646794 |
| H | 0.494206  | 1.800724  | -1.277515 |

Frequencies

|         |         |         |         |         |         |
|---------|---------|---------|---------|---------|---------|
| 200.05i | 115.29  | 130.37  | 152.71  | 168.96  | 257.23  |
| 297.55  | 397.82  | 435.83  | 548.74  | 623.21  | 676.81  |
| 807.30  | 867.67  | 984.88  | 998.33  | 1011.00 | 1042.62 |
| 1093.22 | 1166.26 | 1264.24 | 1320.54 | 1431.70 | 1447.04 |
| 1470.34 | 1489.33 | 1506.16 | 1519.75 | 1529.65 | 1685.85 |
| 3064.95 | 3104.12 | 3133.63 | 3155.73 | 3211.01 | 3261.18 |
| 3368.55 | 3877.66 | 3925.33 |         |         |         |

E (BHandHLYP) .....-308.0491307

TS<sub>ter</sub> BHandHLYP/ aug-cc-pVDZ

Cartesian Coordinates

|   |           |           |           |
|---|-----------|-----------|-----------|
| C | -0.448143 | 0.451796  | 1.407709  |
| H | 0.488213  | 0.646168  | 1.910139  |
| H | -1.355245 | 0.860208  | 1.833659  |
| C | -0.482568 | -0.267501 | 0.257875  |
| C | -1.766605 | -0.673459 | -0.392634 |
| H | -2.619603 | -0.159204 | 0.047088  |
| H | -1.735867 | -0.458782 | -1.460233 |
| H | -1.917139 | -1.750401 | -0.273840 |
| C | 0.752824  | -0.948681 | -0.271594 |
| H | 0.669762  | -1.020102 | -1.360187 |
| H | 0.783584  | -1.968290 | 0.120847  |
| O | 1.946641  | -0.327243 | 0.106195  |
| H | 1.892381  | 0.571266  | -0.220402 |
| O | 0.024524  | 1.521453  | -0.859050 |
| H | -0.356716 | 2.252571  | -0.367084 |

Frequencies

|         |         |         |         |         |         |
|---------|---------|---------|---------|---------|---------|
| 225.53i | 139.82  | 181.76  | 194.50  | 209.82  | 252.33  |
| 298.92  | 393.87  | 399.92  | 531.90  | 588.40  | 687.88  |
| 706.18  | 860.58  | 938.70  | 975.12  | 1007.63 | 1047.74 |
| 1084.12 | 1164.27 | 1261.14 | 1325.26 | 1436.63 | 1442.54 |
| 1469.39 | 1482.41 | 1509.24 | 1523.34 | 1533.66 | 1652.43 |
| 3110.06 | 3116.84 | 3156.19 | 3187.43 | 3221.18 | 3242.04 |
| 3350.53 | 3920.77 | 3923.89 |         |         |         |

E (BHandHLYP) .....-308.0494352

IM<sub>pri</sub> BHandHLYP/ aug-cc-pVDZ

Cartesian Coordinates

|   |           |           |           |
|---|-----------|-----------|-----------|
| C | 0.174830  | 1.111597  | 0.536592  |
| H | 0.598721  | 0.747937  | 1.475796  |
| H | -0.550572 | 1.892839  | 0.776782  |
| C | -0.469395 | 0.015401  | -0.235232 |
| C | -1.942193 | -0.035187 | -0.443178 |
| H | -2.378185 | 0.963555  | -0.504196 |
| H | -2.196237 | -0.573796 | -1.360213 |
| H | -2.452989 | -0.559946 | 0.376765  |
| C | 0.330053  | -1.194016 | -0.602258 |
| H | 0.235189  | -1.379118 | -1.683505 |
| H | -0.090803 | -2.081253 | -0.112250 |
| O | 1.681339  | -1.141253 | -0.221183 |
| H | 2.016122  | -0.262618 | -0.399166 |
| O | 1.296048  | 1.675559  | -0.155383 |
| H | 0.988037  | 2.053602  | -0.975301 |

Frequencies

|         |         |         |         |         |         |
|---------|---------|---------|---------|---------|---------|
| 77.74   | 80.58   | 119.37  | 192.94  | 249.51  | 340.06  |
| 371.86  | 441.75  | 551.55  | 559.21  | 805.70  | 933.80  |
| 970.31  | 997.03  | 1041.64 | 1051.73 | 1145.89 | 1194.64 |
| 1247.10 | 1287.21 | 1361.24 | 1381.08 | 1416.53 | 1446.07 |
| 1453.06 | 1488.79 | 1501.93 | 1516.45 | 1533.17 | 1534.88 |
| 3026.85 | 3051.37 | 3078.88 | 3117.14 | 3130.23 | 3161.02 |
| 3180.52 | 3917.57 | 3974.95 |         |         |         |

E (BHandHLYP) .....-308.0886748



IM<sub>ter</sub> BHandHLYP/ aug-cc-pVDZ

Cartesian Coordinates

|   |           |           |           |
|---|-----------|-----------|-----------|
| C | -0.368152 | 0.569052  | 1.356347  |
| H | 0.552150  | 0.784624  | 1.879728  |
| H | -1.304473 | 0.609075  | 1.896780  |
| C | -0.339518 | 0.286133  | -0.107367 |
| C | -1.648658 | -0.312880 | -0.594316 |
| H | -2.482622 | 0.350759  | -0.358835 |
| H | -1.621542 | -0.457154 | -1.674036 |
| H | -1.836818 | -1.274359 | -0.112874 |
| C | 0.835040  | -0.617428 | -0.479139 |
| H | 0.789335  | -0.812941 | -1.556036 |
| H | 0.753837  | -1.567065 | 0.048367  |
| O | 2.070764  | -0.054614 | -0.127020 |
| H | 2.102369  | 0.819449  | -0.511038 |
| O | -0.062001 | 1.500995  | -0.832767 |
| H | -0.589337 | 2.209194  | -0.474056 |

Frequencies

|         |         |         |         |         |         |
|---------|---------|---------|---------|---------|---------|
| 110.06  | 150.16  | 232.22  | 247.01  | 270.62  | 346.40  |
| 366.35  | 402.69  | 453.77  | 465.76  | 569.24  | 601.60  |
| 810.29  | 924.92  | 935.40  | 986.76  | 1031.60 | 1140.52 |
| 1165.21 | 1199.63 | 1258.91 | 1285.43 | 1400.86 | 1419.94 |
| 1448.33 | 1474.47 | 1498.52 | 1524.25 | 1527.35 | 1537.35 |
| 3101.43 | 3119.17 | 3189.14 | 3195.09 | 3209.01 | 3236.68 |
| 3358.84 | 3961.72 | 3988.71 |         |         |         |

E (BHandHLYP) .....-308.0892122

C: Cartesian coordinates (angstroms), vibrational frequencies (cm-1) and electronic energies (hartrees) for the stationary points on the M2 + OH Potential Energy Surface calculated at BHandHLYP/cc-pVDZ

M2 BHandHLYP/ cc-pVDZ

Cartesian Coordinates

|   |           |           |           |
|---|-----------|-----------|-----------|
| C | 0.010683  | 1.445627  | -0.168029 |
| C | 0.000939  | 0.125323  | -0.020688 |
| H | 0.940716  | 2.001671  | -0.229325 |
| H | -0.911046 | 2.014993  | -0.232378 |
| C | -1.274057 | -0.659091 | 0.065735  |
| H | -1.326803 | -1.405545 | -0.735516 |
| H | -1.327934 | -1.211354 | 1.011289  |
| H | -2.153071 | -0.015653 | -0.006406 |
| C | 1.264218  | -0.677350 | 0.069909  |
| H | 1.308933  | -1.424395 | -0.731264 |
| H | 2.152627  | -0.046628 | 0.000829  |
| H | 1.306970  | -1.230433 | 1.015535  |

Frequencies

|         |         |         |         |         |         |
|---------|---------|---------|---------|---------|---------|
| 175.37  | 222.49  | 388.30  | 449.77  | 457.28  | 726.71  |
| 851.75  | 965.58  | 989.52  | 1017.22 | 1047.20 | 1114.24 |
| 1137.87 | 1343.94 | 1444.51 | 1455.92 | 1476.64 | 1495.02 |
| 1507.00 | 1513.87 | 1527.36 | 1806.28 | 3103.85 | 3109.48 |
| 3160.97 | 3164.26 | 3211.59 | 3212.97 | 3230.60 | 3321.63 |

E (BHandHLYP) .....-157.1235288

$\sigma$ -PC<sub>ter</sub> BHandHLYP/ cc-pVDZ

Cartesian Coordinates

|   |           |           |           |
|---|-----------|-----------|-----------|
| C | 0.364354  | -0.174911 | 1.418042  |
| C | -0.457088 | -0.026215 | 0.378153  |
| H | 0.784597  | 0.682574  | 1.933416  |
| H | 0.628415  | -1.159426 | 1.792647  |
| C | -1.048948 | -1.198751 | -0.342782 |
| H | -2.143595 | -1.148371 | -0.333777 |
| H | -0.730389 | -1.193286 | -1.389646 |
| H | -0.745245 | -2.147310 | 0.105216  |
| C | -0.855363 | 1.323677  | -0.135821 |
| H | -1.941307 | 1.455876  | -0.067368 |
| H | -0.373451 | 2.127991  | 0.422882  |
| H | -0.579801 | 1.424291  | -1.189520 |
| O | 1.767845  | 0.061122  | -1.139078 |
| H | 2.299682  | -0.493159 | -0.550335 |

Frequencies

|         |         |         |         |         |         |
|---------|---------|---------|---------|---------|---------|
| 66.11   | 79.16   | 93.66   | 115.84  | 166.97  | 209.89  |
| 332.80  | 391.01  | 449.81  | 459.51  | 726.34  | 852.57  |
| 951.67  | 993.09  | 1018.54 | 1043.80 | 1117.71 | 1137.36 |
| 1345.73 | 1442.05 | 1454.88 | 1472.40 | 1495.65 | 1504.86 |
| 1515.55 | 1527.17 | 1780.37 | 3112.79 | 3118.20 | 3181.39 |
| 3185.29 | 3211.42 | 3219.56 | 3226.23 | 3319.93 | 3848.53 |

E (BHandHLYP) .....-232.8327446

$\pi$ -PC BHandHLYP/ cc-pVDZ

Cartesian Coordinates

|   |           |           |           |
|---|-----------|-----------|-----------|
| C | -0.534326 | -0.724861 | 1.341535  |
| H | -1.129865 | -1.569707 | 1.673032  |
| H | 0.327546  | -0.458484 | 1.945293  |
| C | -0.862045 | -0.028717 | 0.254228  |
| C | -2.048708 | -0.383215 | -0.591841 |
| H | -1.729718 | -0.655529 | -1.604230 |
| H | -2.610807 | -1.220470 | -0.173814 |
| H | -2.724028 | 0.473781  | -0.689839 |
| C | -0.049977 | 1.140315  | -0.218633 |
| H | 0.364783  | 0.941276  | -1.213218 |
| H | -0.675101 | 2.035595  | -0.306979 |
| O | 0.825570  | -1.759929 | -1.722932 |
| H | 0.562343  | -1.640825 | -0.793868 |
| H | 0.777128  | 1.361579  | 0.458596  |

Frequencies

|         |         |         |         |         |         |
|---------|---------|---------|---------|---------|---------|
| 58.18   | 61.22   | 121.03  | 175.99  | 219.15  | 332.77  |
| 386.07  | 392.19  | 450.97  | 469.88  | 737.31  | 850.26  |
| 969.98  | 992.18  | 1017.14 | 1051.57 | 1116.97 | 1140.63 |
| 1349.92 | 1446.87 | 1459.48 | 1475.24 | 1496.58 | 1512.40 |
| 1516.39 | 1527.81 | 1791.36 | 3110.78 | 3115.34 | 3174.35 |
| 3176.40 | 3215.34 | 3216.37 | 3229.38 | 3322.46 | 3758.16 |

E (BHandHLYP) .....-232.8338157

TS<sub>pri</sub> BHandHLYP/ cc-pVDZ

Cartesian Coordinates

|   |           |           |           |
|---|-----------|-----------|-----------|
| C | -0.168808 | 0.917821  | -0.381888 |
| C | 0.000753  | 0.776149  | -1.718413 |
| H | 0.097173  | 1.841720  | 0.117637  |
| H | -0.776226 | 0.219313  | 0.177430  |
| C | -0.439670 | -0.459903 | -2.435027 |
| H | -1.103047 | -0.211625 | -3.271952 |
| H | 0.422425  | -0.986904 | -2.860544 |
| H | -0.960451 | -1.149537 | -1.769236 |
| C | 0.709534  | 1.807513  | -2.540046 |
| H | 0.060670  | 2.171693  | -3.345548 |
| H | 1.021933  | 2.665935  | -1.941459 |
| H | 1.595964  | 1.383876  | -3.028405 |
| O | 1.504963  | -0.168984 | 0.277551  |
| H | 2.162602  | 0.265751  | -0.279088 |

Frequencies

|         |         |         |         |         |         |
|---------|---------|---------|---------|---------|---------|
| 319.59i | 95.64   | 107.49  | 139.54  | 177.11  | 194.60  |
| 386.79  | 444.61  | 449.32  | 732.38  | 824.44  | 846.21  |
| 967.07  | 990.33  | 1016.71 | 1034.60 | 1103.21 | 1116.46 |
| 1348.90 | 1440.22 | 1455.55 | 1462.22 | 1492.26 | 1503.21 |
| 1510.74 | 1526.68 | 1676.31 | 3099.67 | 3107.64 | 3154.25 |
| 3161.99 | 3207.86 | 3222.15 | 3254.55 | 3356.24 | 3866.69 |

E (BHandHLYP) .....-232.8290677

TS<sub>ter</sub> BHandHLYP/ cc-pVDZ

Cartesian Coordinates

|   |           |           |           |
|---|-----------|-----------|-----------|
| C | 0.407325  | -0.169072 | 1.394124  |
| C | -0.294503 | -0.013555 | 0.237968  |
| H | 0.824640  | 0.685326  | 1.914469  |
| H | 0.607766  | -1.155407 | 1.800155  |
| C | -0.987716 | -1.177082 | -0.406542 |
| H | -2.055261 | -1.160152 | -0.157276 |
| H | -0.893411 | -1.122315 | -1.492246 |
| H | -0.575361 | -2.130341 | -0.069196 |
| C | -0.727625 | 1.345140  | -0.225506 |
| H | -1.776798 | 1.511605  | 0.044833  |
| H | -0.122829 | 2.132442  | 0.226342  |
| H | -0.642139 | 1.423493  | -1.310730 |
| O | 1.439871  | -0.009277 | -0.921699 |
| H | 1.995551  | -0.668867 | -0.488758 |

Frequencies

|         |         |         |         |         |         |
|---------|---------|---------|---------|---------|---------|
| 351.37i | 146.93  | 170.52  | 220.13  | 226.11  | 243.47  |
| 390.56  | 405.45  | 441.00  | 659.63  | 758.67  | 841.12  |
| 874.62  | 988.06  | 1003.87 | 1045.16 | 1100.20 | 1108.99 |
| 1347.70 | 1433.39 | 1455.80 | 1464.49 | 1494.16 | 1506.34 |
| 1511.19 | 1527.95 | 1643.44 | 3116.86 | 3122.84 | 3193.66 |
| 3200.42 | 3226.63 | 3231.64 | 3234.70 | 3335.94 | 3867.05 |

E (BHandHLYP) .....-232.8293023

IM<sub>pri</sub> BHandHLYP/ cc-pVDZ

Cartesian Coordinates

|   |           |           |           |
|---|-----------|-----------|-----------|
| C | 0.847502  | -0.362422 | -0.653306 |
| C | -0.397200 | -0.087839 | 0.125908  |
| H | 1.070553  | -1.439601 | -0.628425 |
| H | 0.704343  | -0.103174 | -1.714148 |
| C | -0.754365 | 1.328717  | 0.420055  |
| H | -1.383268 | 1.754974  | -0.379894 |
| H | -1.330215 | 1.416248  | 1.347875  |
| H | 0.138657  | 1.951654  | 0.497643  |
| C | -1.471648 | -1.118916 | 0.141239  |
| H | -2.115416 | -1.049526 | -0.751982 |
| C | -1.064819 | -2.134910 | 0.161112  |
| H | -2.131491 | -0.997554 | 1.006824  |
| O | 1.957818  | 0.399814  | -0.241622 |
| H | 2.108848  | 0.212930  | 0.684515  |

Frequencies

|         |         |         |         |         |         |
|---------|---------|---------|---------|---------|---------|
| 32.71   | 89.43   | 102.80  | 192.47  | 328.71  | 360.35  |
| 403.21  | 529.37  | 787.94  | 951.51  | 974.65  | 1015.69 |
| 1036.61 | 1071.50 | 1076.13 | 1202.53 | 1338.07 | 1349.19 |
| 1410.63 | 1439.43 | 1443.46 | 1458.17 | 1495.37 | 1499.41 |
| 1507.57 | 1520.76 | 1533.24 | 3036.76 | 3067.60 | 3091.27 |
| 3137.47 | 3144.16 | 3154.77 | 3188.33 | 3190.90 | 3944.92 |

E (BHandHLYP) .....-232.873043

E (CCSD(T) /cc-pVDZ//BHandHLYP/cc-pVDZ) .....-232.36172956

IM<sub>ter</sub> BHandHLYP/ cc-pVDZ

Cartesian Coordinates

|   |           |           |           |
|---|-----------|-----------|-----------|
| C | 0.131679  | 1.312666  | -0.781820 |
| C | 0.002832  | 0.042458  | -0.003428 |
| H | 0.918605  | 2.010471  | -0.514938 |
| H | -0.412122 | 1.465383  | -1.707788 |
| C | -1.372499 | -0.586160 | -0.206876 |
| H | -1.540837 | -0.843292 | -1.256752 |
| H | -1.460272 | -1.493638 | 0.395263  |
| H | -2.162821 | 0.107346  | 0.099066  |
| C | 1.104949  | -0.941647 | -0.386014 |
| H | 1.030507  | -1.225221 | -1.438607 |
| H | 2.084953  | -0.492698 | -0.209524 |
| H | 1.024071  | -1.841700 | 0.230563  |
| O | 0.216275  | 0.301574  | 1.378128  |
| H | -0.411953 | 0.970184  | 1.649676  |

Frequencies

|         |         |         |         |         |         |
|---------|---------|---------|---------|---------|---------|
| 148.96  | 230.38  | 279.14  | 328.91  | 345.80  | 365.92  |
| 413.92  | 457.24  | 481.60  | 562.38  | 796.60  | 935.87  |
| 965.37  | 974.28  | 1027.08 | 1044.29 | 1172.80 | 1276.32 |
| 1308.83 | 1390.18 | 1434.46 | 1446.03 | 1481.11 | 1499.65 |
| 1508.08 | 1522.39 | 1532.59 | 3116.02 | 3125.81 | 3190.13 |
| 3205.83 | 3213.35 | 3218.79 | 3226.89 | 3345.66 | 3940.09 |

E (BHandHLYP) .....-232.8722004

E (CCSD(T) /cc-pVDZ//BHandHLYP/cc-pVDZ) .....-232.36410512



D : Cartesian coordinates (angstroms), vibrational frequencies (cm-1) and electronic energies (hartrees) for the stationary points on the M2 + OH Potential Energy Surface calculated at BHandHLYP/aug-cc-pVDZ

M2 BHandHLYP/ aug-cc-pVDZ

Cartesian Coordinates

|   |           |           |           |
|---|-----------|-----------|-----------|
| C | 0.010670  | 1.445465  | -0.167705 |
| C | 0.000929  | 0.124147  | -0.020500 |
| H | 0.938235  | 2.000991  | -0.228872 |
| H | -0.908607 | 2.014264  | -0.231912 |
| C | -1.274109 | -0.660180 | 0.065774  |
| H | -1.324748 | -1.404259 | -0.734489 |
| H | -1.326184 | -1.210085 | 1.009978  |
| H | -2.149409 | -0.015827 | -0.006706 |
| C | 1.264263  | -0.678428 | 0.069889  |
| H | 1.306956  | -1.422924 | -0.730437 |
| H | 2.148964  | -0.046705 | 0.000607  |
| H | 1.305214  | -1.229295 | 1.014064  |

Frequencies

|         |         |         |         |         |         |
|---------|---------|---------|---------|---------|---------|
| 174.91  | 223.27  | 392.26  | 454.35  | 459.39  | 722.84  |
| 849.82  | 970.32  | 990.77  | 1016.88 | 1041.11 | 1114.84 |
| 1132.18 | 1343.80 | 1444.39 | 1453.28 | 1481.61 | 1496.93 |
| 1510.35 | 1516.84 | 1532.42 | 1790.99 | 3100.42 | 3105.81 |
| 3153.92 | 3157.37 | 3205.75 | 3207.08 | 3230.45 | 3318.30 |

E (BHandHLYP) .....-157.1324603

$\sigma$ -PC<sub>pri</sub> BHandHLYP/ aug-cc-pVDZ

Cartesian Coordinates

|   |           |           |           |
|---|-----------|-----------|-----------|
| C | 0.395868  | -0.168315 | 1.201100  |
| C | -0.568999 | -0.025581 | 0.288209  |
| H | 0.917822  | 0.685397  | 1.610066  |
| H | 0.669005  | -1.143137 | 1.585510  |
| C | -1.314806 | -1.199196 | -0.270971 |
| H | -2.384531 | -1.107175 | -0.064065 |
| H | -1.211730 | -1.240665 | -1.359098 |
| H | -0.964188 | -2.141202 | 0.149172  |
| C | -0.973126 | 1.316094  | -0.238893 |
| H | -2.033981 | 1.500015  | -0.046429 |
| H | -0.390880 | 2.117008  | 0.212982  |
| H | -0.832168 | 1.358826  | -1.321895 |
| O | 2.128491  | 0.084073  | -0.698737 |
| H | 1.880654  | -0.806158 | -0.972125 |

Frequencies

|         |         |         |         |         |         |
|---------|---------|---------|---------|---------|---------|
| 24.00   | 50.39   | 95.12   | 151.27  | 169.34  | 217.77  |
| 394.16  | 434.88  | 453.05  | 460.34  | 737.97  | 849.84  |
| 976.92  | 990.89  | 1017.66 | 1035.76 | 1114.97 | 1129.21 |
| 1347.37 | 1444.31 | 1454.54 | 1479.30 | 1496.65 | 1508.99 |
| 1516.90 | 1533.50 | 1758.81 | 3103.33 | 3109.46 | 3157.35 |
| 3164.00 | 3205.23 | 3217.27 | 3239.68 | 3334.96 | 3889.61 |

E (BHandHLYP) .....-232.8533002

$\sigma$ -PC<sub>ter</sub> BHandHLYP/ aug-cc-pVDZ

Cartesian Coordinates

|   |           |           |           |
|---|-----------|-----------|-----------|
| C | 0.387345  | -0.192875 | 1.366826  |
| C | -0.458797 | -0.020508 | 0.346522  |
| H | 0.830034  | 0.650303  | 1.880876  |
| H | 0.640714  | -1.182857 | 1.726238  |
| C | -1.096454 | -1.175562 | -0.361620 |
| H | -2.185282 | -1.121537 | -0.275516 |
| H | -0.853994 | -1.144356 | -1.425843 |
| H | -0.764859 | -2.131299 | 0.042413  |
| C | -0.854062 | 1.339546  | -0.139127 |
| H | -1.933484 | 1.480074  | -0.033512 |
| H | -0.344360 | 2.128369  | 0.411528  |
| H | -0.614204 | 1.446632  | -1.198724 |
| O | 1.813059  | 0.061747  | -0.983204 |
| H | 2.377667  | -0.518367 | -0.461416 |

Frequencies

|         |         |         |         |         |         |
|---------|---------|---------|---------|---------|---------|
| 67.02   | 102.33  | 107.88  | 132.05  | 178.21  | 222.82  |
| 395.11  | 409.38  | 453.03  | 466.62  | 727.28  | 851.26  |
| 964.89  | 993.32  | 1019.12 | 1037.75 | 1118.51 | 1131.41 |
| 1348.93 | 1443.85 | 1455.27 | 1477.70 | 1498.21 | 1509.54 |
| 1519.34 | 1533.45 | 1756.11 | 3108.89 | 3114.28 | 3171.18 |
| 3175.26 | 3208.40 | 3215.17 | 3229.77 | 3322.98 | 3896.93 |

E (BHandHLYP) ..... -232.8540993

$\pi$ -PC BHandHLYP/ aug-cc-pVDZ

Cartesian Coordinates

|   |           |           |           |
|---|-----------|-----------|-----------|
| C | -0.475863 | -0.760438 | 1.210913  |
| H | -1.039939 | -1.631913 | 1.519806  |
| H | 0.412659  | -0.519778 | 1.781600  |
| C | -0.875289 | 0.001024  | 0.192425  |
| C | -2.111530 | -0.307992 | -0.597541 |
| H | -1.868609 | -0.448783 | -1.654374 |
| H | -2.610202 | -1.205577 | -0.235005 |
| H | -2.815812 | 0.526559  | -0.545334 |
| C | -0.116111 | 1.220183  | -0.237899 |
| H | 0.196123  | 1.131248  | -1.282070 |
| H | -0.751920 | 2.107240  | -0.174176 |
| O | 1.131936  | -2.211570 | -1.357397 |
| H | 0.648133  | -1.772811 | -0.638340 |
| H | 0.769220  | 1.383417  | 0.374722  |

Frequencies

|         |         |         |         |         |         |
|---------|---------|---------|---------|---------|---------|
| 33.20   | 40.48   | 123.07  | 171.63  | 223.35  | 333.37  |
| 396.90  | 432.77  | 452.60  | 468.83  | 739.28  | 849.40  |
| 978.82  | 992.01  | 1017.97 | 1043.52 | 1117.73 | 1134.82 |
| 1348.61 | 1448.74 | 1456.69 | 1481.03 | 1497.87 | 1511.40 |
| 1518.63 | 1533.55 | 1778.72 | 3106.32 | 3111.36 | 3162.21 |
| 3165.61 | 3211.09 | 3212.27 | 3229.02 | 3319.80 | 3744.77 |

E (BHandHLYP) .....-232.8553091

TS<sub>pri</sub> BHandHLYP/ aug-cc-pVDZ

Cartesian Coordinates

|   |           |           |           |
|---|-----------|-----------|-----------|
| C | -0.188012 | 0.951845  | -0.394991 |
| C | 0.008387  | 0.797912  | -1.721425 |
| H | 0.031568  | 1.886918  | 0.097519  |
| H | -0.716610 | 0.206243  | 0.182181  |
| C | -0.387900 | -0.454176 | -2.440169 |
| H | -1.099470 | -0.226586 | -3.239164 |
| H | 0.477983  | -0.919010 | -2.921414 |
| H | -0.845779 | -1.180767 | -1.769973 |
| C | 0.673704  | 1.853226  | -2.545559 |
| H | 0.023752  | 2.164854  | -3.368602 |
| H | 0.928929  | 2.727480  | -1.949753 |
| H | 1.591645  | 1.465861  | -2.996552 |
| O | 1.800031  | 0.313372  | 0.277919  |
| H | 1.829587  | -0.514355 | -0.209008 |

Frequencies

|         |         |         |         |         |         |
|---------|---------|---------|---------|---------|---------|
| 192.50i | 83.01   | 103.18  | 148.27  | 159.34  | 202.51  |
| 393.47  | 450.19  | 459.30  | 669.31  | 797.22  | 845.70  |
| 983.58  | 991.46  | 1017.16 | 1030.15 | 1107.43 | 1118.75 |
| 1350.45 | 1443.24 | 1454.79 | 1469.98 | 1495.13 | 1507.36 |
| 1515.15 | 1533.70 | 1691.93 | 3099.32 | 3105.60 | 3151.13 |
| 3157.05 | 3205.56 | 3218.04 | 3257.11 | 3355.43 | 3918.81 |

E (BHandHLYP) .....-232.8527261

TS<sub>ter</sub> BHandHLYP/ aug-cc-pVDZ

Cartesian Coordinates

|   |           |           |           |
|---|-----------|-----------|-----------|
| C | 0.414881  | -0.174564 | 1.380702  |
| C | -0.309806 | -0.016285 | 0.240829  |
| H | 0.839261  | 0.675784  | 1.896482  |
| H | 0.619175  | -1.159109 | 1.781967  |
| C | -1.007894 | -1.175965 | -0.402241 |
| H | -2.073115 | -1.143445 | -0.155901 |
| H | -0.913450 | -1.123291 | -1.485825 |
| H | -0.605850 | -2.128719 | -0.060708 |
| C | -0.735073 | 1.342281  | -0.226129 |
| H | -1.784829 | 1.504516  | 0.034230  |
| H | -0.136382 | 2.127361  | 0.231173  |
| H | -0.642710 | 1.418824  | -1.308694 |
| O | 1.474182  | -0.020045 | -0.913008 |
| H | 2.061120  | -0.635405 | -0.466941 |

Frequencies

|         |         |         |         |         |         |
|---------|---------|---------|---------|---------|---------|
| 294.80i | 145.26  | 173.82  | 215.72  | 226.38  | 245.26  |
| 395.00  | 409.64  | 447.04  | 667.65  | 737.50  | 841.70  |
| 908.89  | 986.60  | 1008.50 | 1044.09 | 1105.01 | 1111.12 |
| 1351.55 | 1438.57 | 1457.04 | 1469.84 | 1499.40 | 1511.25 |
| 1518.03 | 1535.21 | 1646.74 | 3113.36 | 3119.31 | 3187.28 |
| 3192.23 | 3220.82 | 3227.64 | 3234.44 | 3335.91 | 3920.86 |

E (BHandHLYP) .....-232.8520136

IM<sub>pri</sub> BHandHLYP/ aug-cc-pVDZ

Cartesian Coordinates

|   |           |           |           |
|---|-----------|-----------|-----------|
| C | 0.715691  | -0.178774 | 1.178033  |
| C | -0.505270 | 0.007878  | 0.351188  |
| H | 0.809546  | 0.634802  | 1.904793  |
| H | 0.662659  | -1.126267 | 1.724219  |
| C | -1.057485 | -1.163564 | -0.384861 |
| H | -2.112623 | -1.020983 | -0.628774 |
| H | -0.526787 | -1.317978 | -1.334703 |
| H | -0.957028 | -2.085853 | 0.190359  |
| C | -0.843783 | 1.377838  | -0.125907 |
| H | -1.902753 | 1.462217  | -0.379943 |
| H | -0.606123 | 2.136217  | 0.622449  |
| H | -0.275330 | 1.631253  | -1.031615 |
| O | 1.857887  | -0.185559 | 0.315228  |
| H | 2.645900  | -0.304636 | 0.837791  |

Frequencies

|         |         |         |         |         |         |
|---------|---------|---------|---------|---------|---------|
| 52.36   | 117.80  | 120.57  | 199.01  | 262.53  | 373.97  |
| 402.29  | 533.08  | 788.55  | 946.22  | 995.89  | 1020.30 |
| 1039.48 | 1045.01 | 1074.77 | 1251.26 | 1259.30 | 1344.37 |
| 1371.56 | 1437.40 | 1442.43 | 1478.02 | 1497.70 | 1503.62 |
| 1509.58 | 1526.34 | 1550.89 | 3056.00 | 3060.47 | 3086.79 |
| 3128.43 | 3137.31 | 3139.68 | 3182.32 | 3184.83 | 3985.74 |

E (BHandHLYP) .....-232.8939089

IM<sub>ter</sub> BHandHLYP/ aug-cc-pVDZ

Cartesian Coordinates

|   |           |           |           |
|---|-----------|-----------|-----------|
| C | 0.024758  | 1.318065  | -0.780625 |
| C | -0.000237 | 0.040310  | -0.006126 |
| H | 0.796009  | 2.047238  | -0.570103 |
| H | -0.629499 | 1.479791  | -1.626583 |
| C | -1.325859 | -0.689791 | -0.194346 |
| H | -1.480810 | -0.948742 | -1.243151 |
| H | -1.334904 | -1.604720 | 0.397495  |
| H | -2.161074 | -0.063133 | 0.125251  |
| C | 1.171237  | -0.855981 | -0.397130 |
| H | 1.098992  | -1.147804 | -1.445014 |
| H | 2.113525  | -0.331510 | -0.241935 |
| H | 1.169531  | -1.754470 | 0.221861  |
| O | 0.205412  | 0.318604  | 1.380884  |
| H | -0.447917 | 0.951153  | 1.667636  |

Frequencies

|         |         |         |         |         |         |
|---------|---------|---------|---------|---------|---------|
| 117.22  | 227.87  | 277.26  | 330.23  | 334.22  | 358.69  |
| 422.27  | 461.61  | 483.16  | 576.79  | 794.51  | 937.95  |
| 964.84  | 971.53  | 1026.63 | 1049.54 | 1171.58 | 1261.90 |
| 1311.21 | 1383.59 | 1436.40 | 1450.09 | 1495.26 | 1507.49 |
| 1515.17 | 1529.47 | 1539.29 | 3116.25 | 3124.74 | 3187.61 |
| 3201.16 | 3209.73 | 3213.37 | 3230.92 | 3350.08 | 3980.23 |

E (BHandHLYP) .....-232.8933573



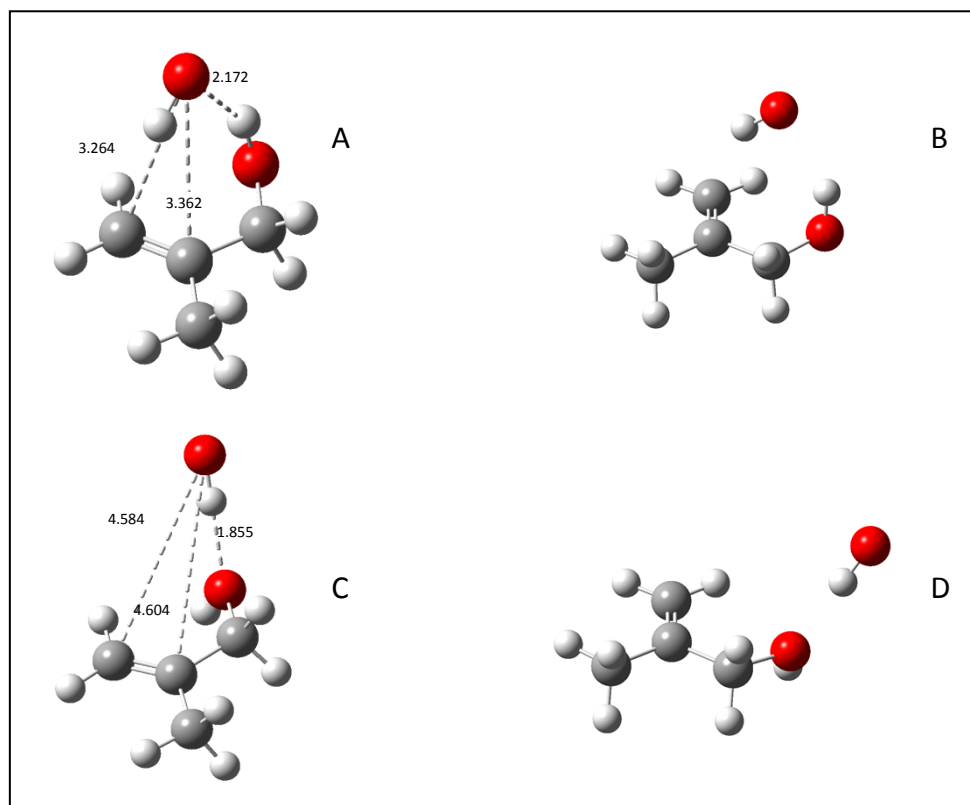

Figure: Reaction Profile showing the contribution of both  $\pi$ -PC (denoted as  $1\pi$ -PC in this Figure) and  $2\pi$ -PC paths. A: Comparison of the optimized geometries, located at the BHandHLYP/aug-cc-pVDZ level, for the  $\pi$ -PC. A:  $1\pi$ -PC, as reported at the manuscript, representing an upward OH attack to MPO221. B:  $1\pi$ -PC, from another view. C:  $2\pi$ -PC, representing an upward OH attack to the mirror image of MPO221 and resembling Zhang's PC. C:  $2\pi$ -PC, from another view.

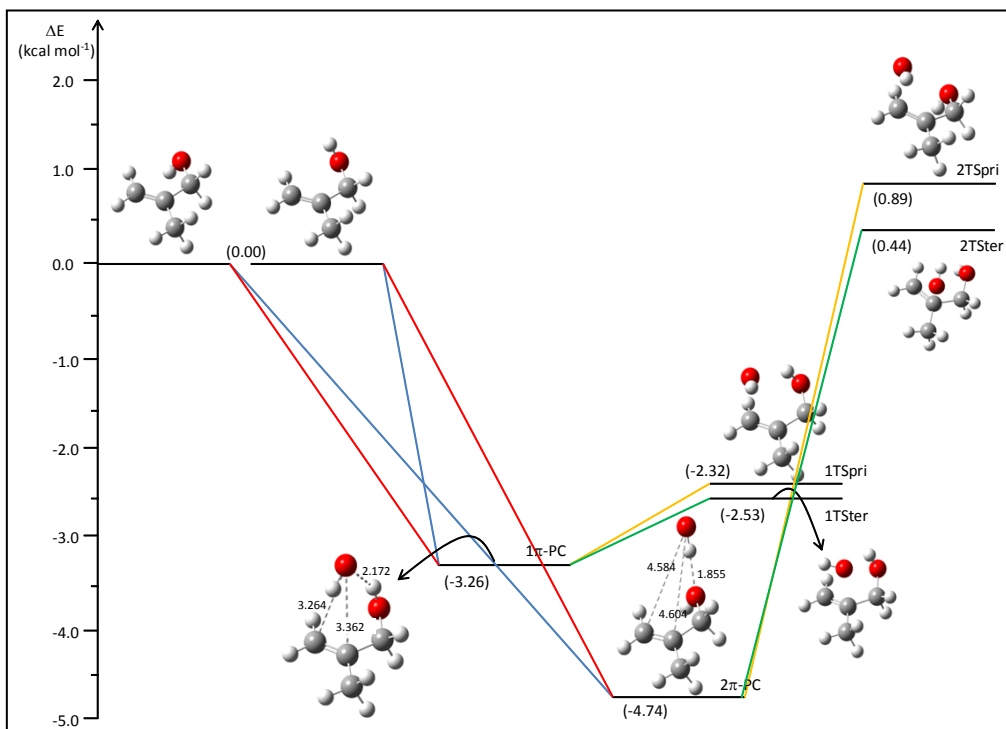

Figure: Reaction Profile showing the contribution of both  $\pi$ -PC (denoted as  $1\pi$ -PC in this Figure) and  $2\pi$ -PC paths. B: Reaction profile showing the contribution of both upward and downward attack to MPO221, resulting from two conformers (mirror images) of the reactant. The blue lines represent the upward attacks; the red lines represent the downward attack; the yellow lines represent the connection between the  $\pi$ -PC and TS<sub>pri</sub> along the  $\pi$ -PC  $\rightarrow$  IM<sub>pri</sub> reaction path; the green lines represent the connection between the  $\pi$ -PC and TS<sub>ter</sub> along the  $\pi$ -PC  $\rightarrow$  IM<sub>ter</sub> reaction path.

Table: Electronic energies (hartree) calculated for the stationary points along the MPO221 + OH reaction path at different theoretical levels with the cc-pVDZ basis set.

|           | BHandHLYP    | M06-2X       | PMP2         | QCISD_opt    | CCSD         | CCSD(T)      |
|-----------|--------------|--------------|--------------|--------------|--------------|--------------|
| Reactants | -308.0083691 | -308.0405827 | -307.2678462 | -307.3371760 | -307.3359543 | -307.3625151 |
| $\pi$ -PC | -308.0215015 | -308.0564629 | -307.2806319 | -307.3487047 | -307.3473857 | -307.3747570 |
| TSpri     | -308.0178656 | -308.0561336 | -307.2768660 | -307.3426968 | -307.3406502 | -307.3690064 |
| TSter     | -308.0183809 | -308.0564510 | -307.2788224 | -307.3444477 | -307.3422644 | -307.3703280 |
